# Supplementary material for: Fundamentals of vaping-associated pulmonary injury leading to severe respiratory distress
Source: PubMed Central journal article supplement (PMC8616545; doi:10.26508/lsa.202101246), 2021-11-22

Full Blots Figure 3C

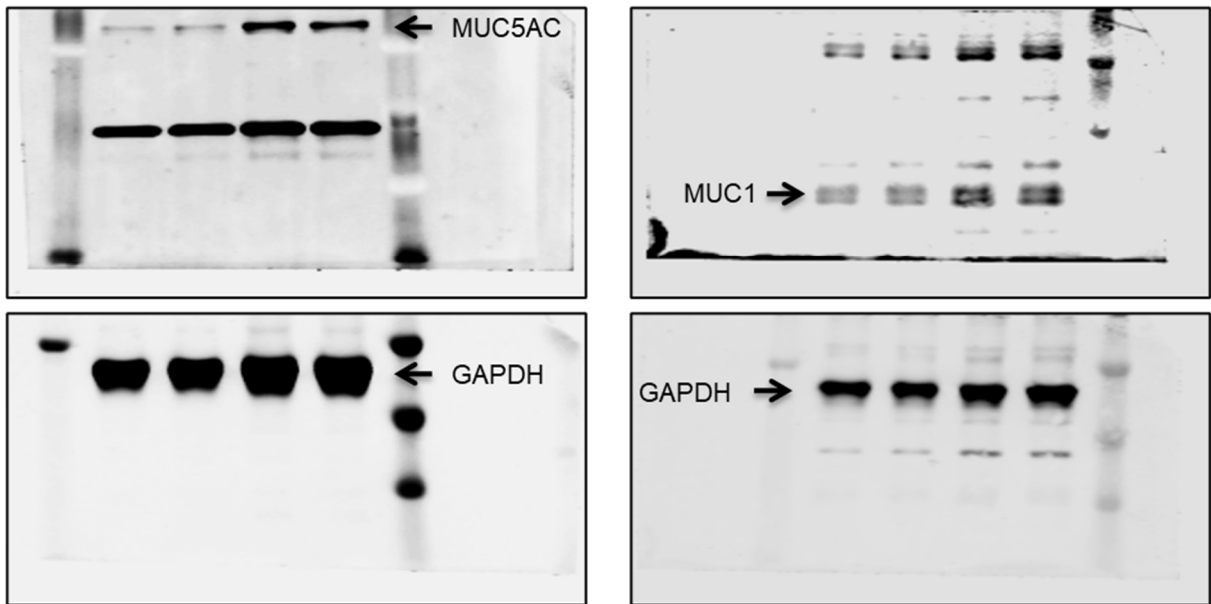

Full Blots Figure 4C

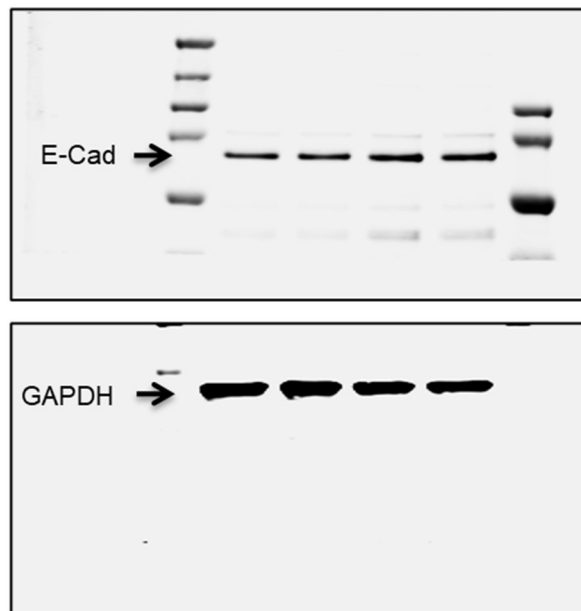

Full Blots Figure 5C

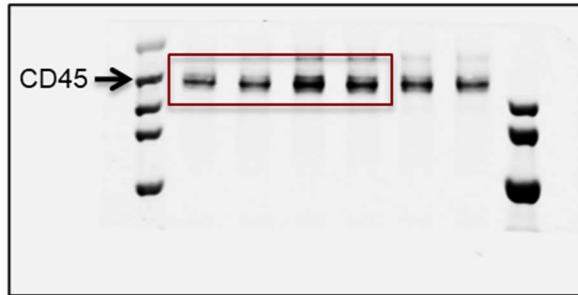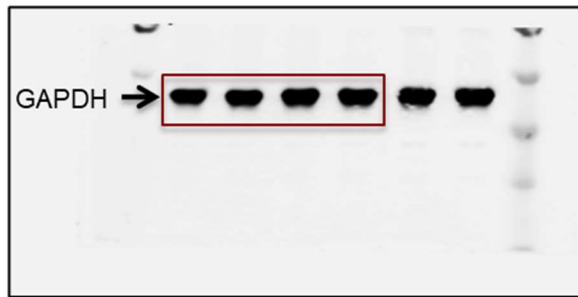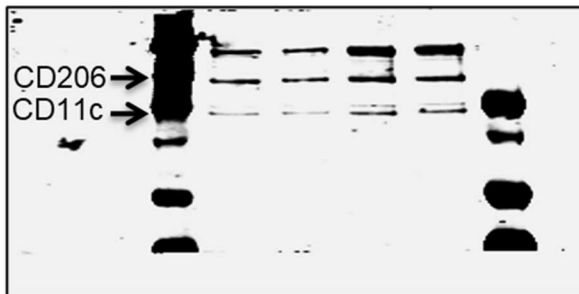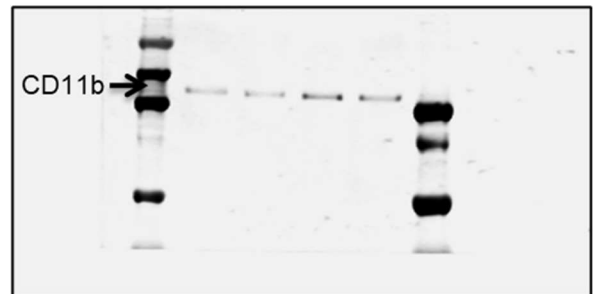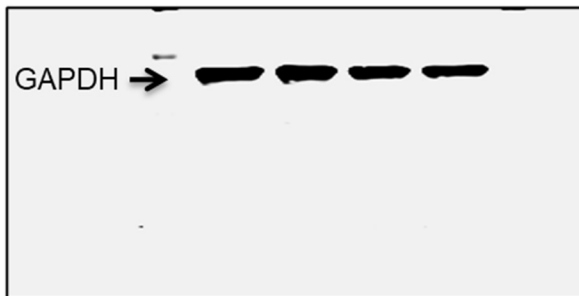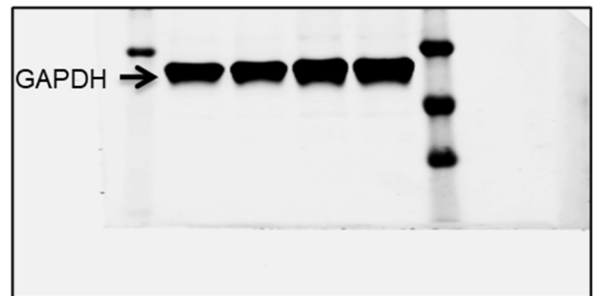

Full Blots Figure 5D

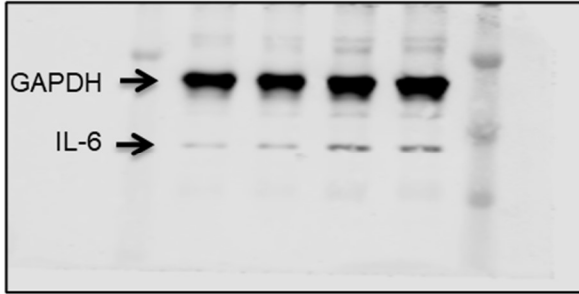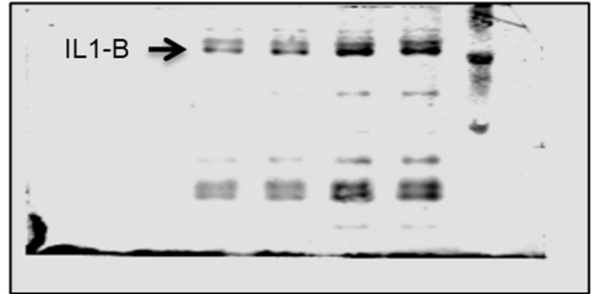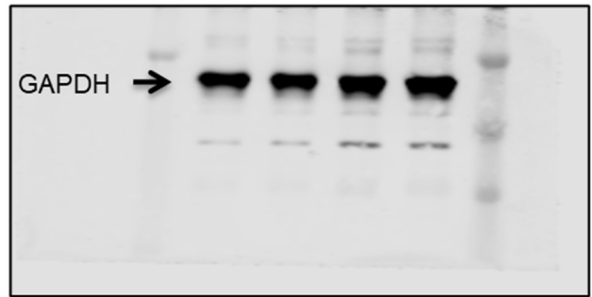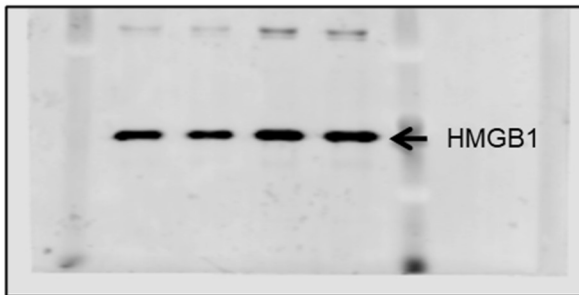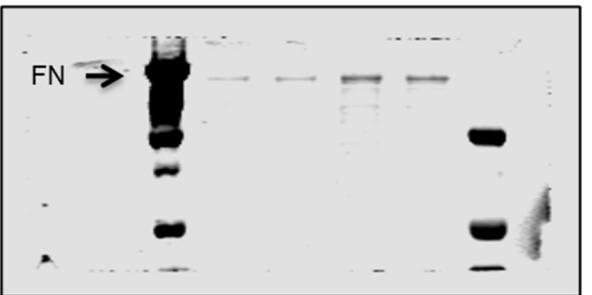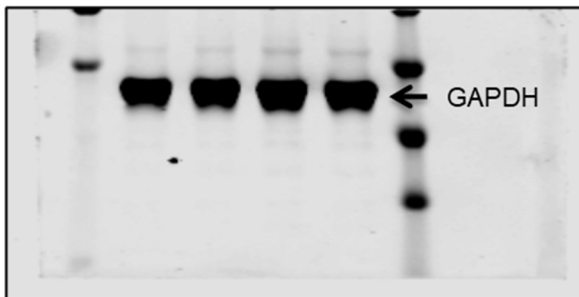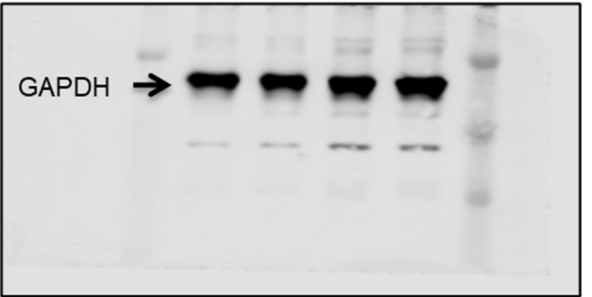

Supplement: LSA-2021-01246_SdataF3.F5.pdf [file LSA-2021-01246_SdataF3.F5.pdf]
